# Supplementary material for: Regulation of SLD5 gene expression by miR-370 during acute growth of cancer cells
Source: PubMed Central journal article supplement (PMC4976388; doi:10.1038/srep30941), 2016-08-08
Supplement: srep30941-s1.pdf [file srep30941-s1.pdf]

**Regulation of SLD5 gene expression by miR-370 during acute growth of cancer cells**

Keitaro Yamane, Hisamichi Naito, Taku Wakabayashi, Hironori Yoshida, Fumitaka Muramatsu, Tomohiro Iba, Hiroyasu Kidoya, Nobuyuki Takakura

Department of Signal Transduction, Research Institute for Microbial Diseases, Osaka University, 3-1 Yamada-oka, Suita, Osaka 565-0871, Japan.

FigS.1

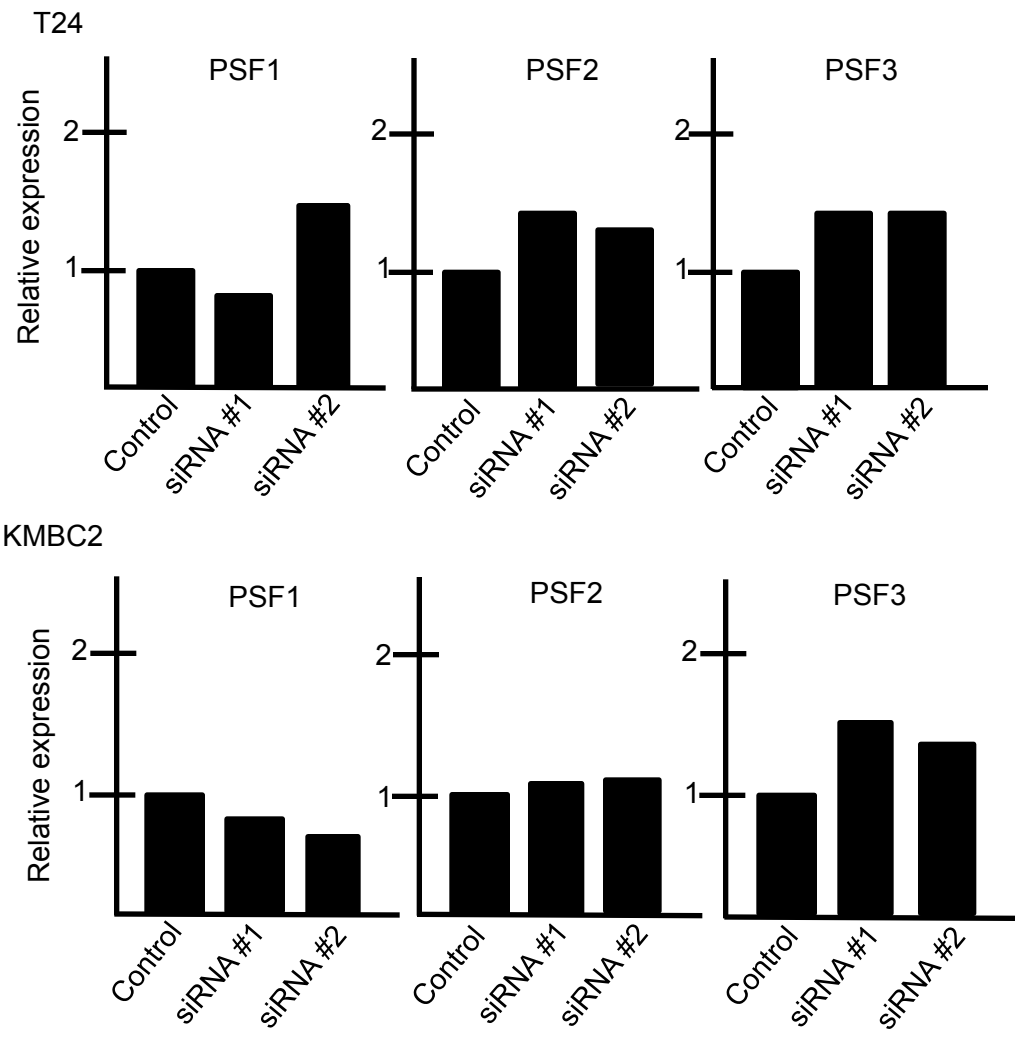

Figure S1. Effect of silencing *SLD5* on mRNA expression of other GINS members. *SLD5* expression was silenced as shown in Fig 2A. qRT-PCR analysis was performed to detect *PSF1*, *PSF2*, and *PSF3* expression. Note that GINS family genes other than *SLD5* were not affected by the knock down of *SLD5* *in vitro* in either T24 or KMBC2 cells. Values for control cells were set at unity.

FigS.2

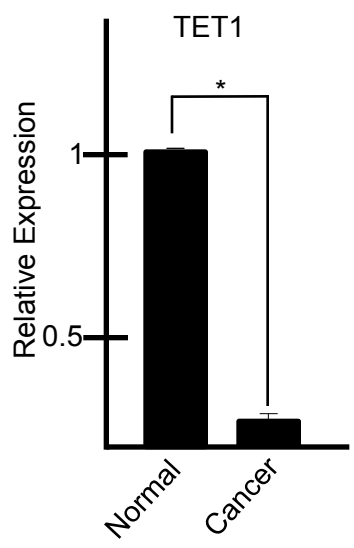

Figure S2. *TET1* expression in cancer cells. qRT-PCR analysis was performed to detect *TET1* mRNA expression in bladder cancer cell line (T24). Data are mean±SE, \*\*\*p<0.0005 (n=3)

FigS.3

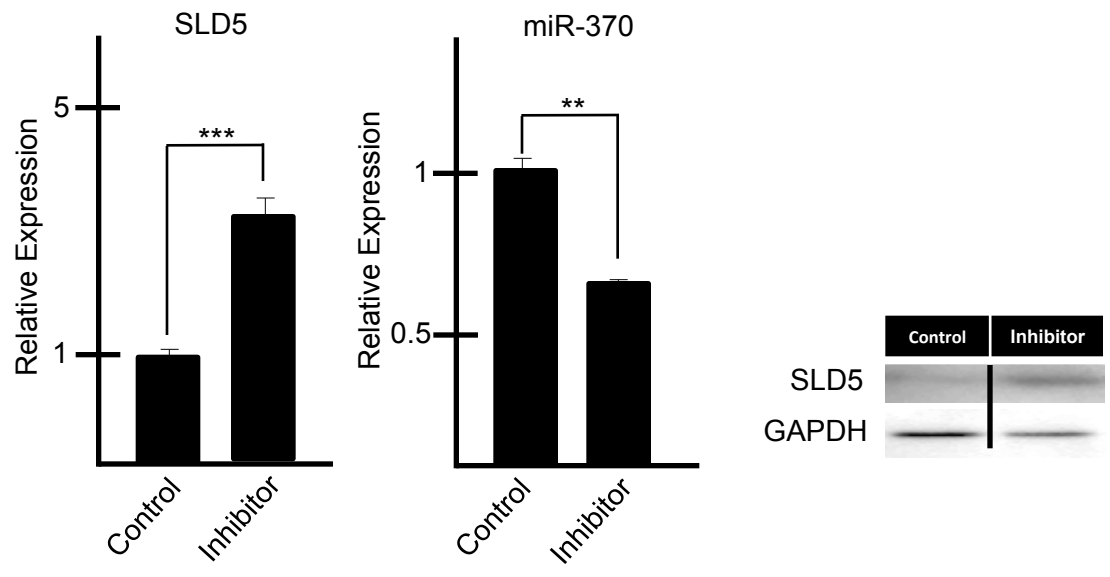

Figure S3. Attenuation of miR-370 expression by miR-370 inhibitor transfection in normal cells. miR-370 expression in HUVEC was inhibited by pre-hsa-miR-370 inhibitor (QIAGEN) under the manufacturer's instructions. After 48h, miRNA and RNA were isolated and cDNA was synthesized for the analysis of miR-370 and *SLD5* respectively. At the same time, protein was also isolated for western blotting analysis of *SLD5* expression level. The level of miR-370 (left) and *SLD5* (right) after transfection of miR-370 inhibitor was confirmed by qRT-PCR. Values for control cells were set at unity. *U6* or *GAPDH* was used as an internal control. Data are mean±SE \*\*p<0.001, \*\*\*p<0.0001. (n=3). Western blotting showed that *SLD5* expression was increased in miR-370 inhibitor-transfected HUVEC.

Supplementary Table1

## Primer set

|         |     |                                 |
|---------|-----|---------------------------------|
| hSLD5   | Fwd | 5'-CCAAATGGAGATGGAGAGGA-3'      |
|         | Rev | 5'-CAGAGAGTTCATGGCGAACA-3'      |
| hPSF1   | Fwd | 5'-GGTCACTGGGAGGAGATGAA-3'      |
|         | Rev | 5'-CAGACAAGGAGTCCTGGAGC-3'      |
| hPSF2   | Fwd | 5'-ACACTCGTATAGCCAAACTC-3'      |
|         | Rev | 5'-CACTCCTGCTGTATCTACAC-3'      |
| hPSF3   | Fwd | 5'-GGAGAGGGGCTTATTTCAAA-3'      |
|         | Rev | 5'-GTGGCTAGTGAAACTGTACA-3'      |
| hIL-6   | Fwd | 5'-GGTACATCCTCGACGGCATCT-3'     |
|         | Rev | 5'-GTGCCTCTTTGCTGCTTTTAC-3'     |
| hDNMT1  | Fwd | 5'-CCATCAGGCATTCTACCA-3'        |
|         | Rev | 5'-CGTTCTCCTTGTCTTCTCT-3'       |
| hTET1   | Fwd | 5'-TAAGAAAAGAAAATGTGAGGAGCT G-3 |
|         | Rev | 5'-CCATTTACTGGTTTGTGTCAAAA T-3' |
| hGAPDH  | Fwd | 5'-CGACCACTTTGTCAAGCTCA-3'      |
|         | Rev | 5'-CAGTTGCCATGTAGACCCCT-3'      |
| miR-370 |     | 5'-GCCTGCTGGGGTGGAACCTGGT-3'    |
